# Supplementary material
Source: Springer Nature journal article supplement (https://www.springermedizin.de/resource/supplementary/12943_2009_697_MOESM2_ESM.pdf/9554602)

p65

Nucleolin

DAPI

Merge

Control

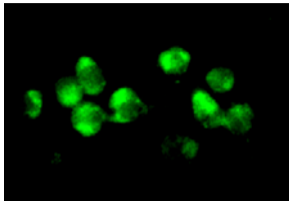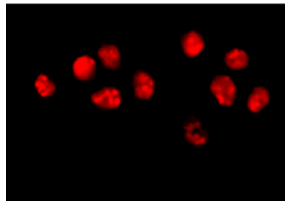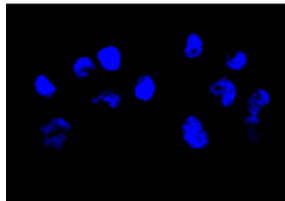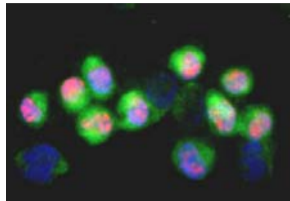

2ME2

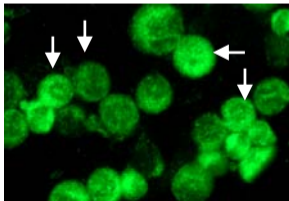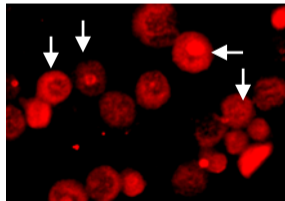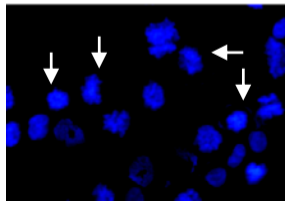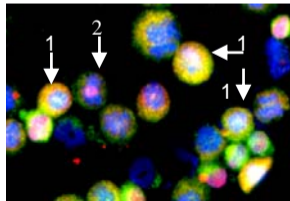

Supplement: MOESM2 [file 9554602]
